# Supplementary material for: Multicenter Machine Learning Model for Assessing the Impact of Malignancy on In-Hospital Mortality in Heart Failure Patients: A Clinical Decision Support System with Interpretable Artificial Intelligence
Source: Research Square preprint supplement (doi:10.21203/rs.3.rs-7179137/v1), 2025-08-21
Supplement: Supplementary file 1 [file 33559d01e3dffb62cc440ada.docx]

**Table2:** Performance comparison of machine learning models for mortality prediction in heart failure patients with malignancy

| **Dataset** | **Model** | **Brier Score** | **Accuracy (95% CI)** | **Sensitivity** | **Specificity** | **PPV** | **NPV** | **F1 Score** |
| --- | --- | --- | --- | --- | --- | --- | --- | --- |
| eICU-Train | AdaBoost | 0.163 | 0.772 (0.755-0.789) | 0.797 | 0.748 | 0.753 | 0.793 | 0.774 |
| eICU-Train | KNN | 0.18 | 0.728 (0.709-0.745) | 0.802 | 0.656 | 0.692 | 0.775 | 0.743 |
| eICU-Train | LR | 0.199 | 0.690 (0.671-0.709) | 0.686 | 0.693 | 0.683 | 0.697 | 0.685 |
| eICU-Train | Naive Bayes | 0.191 | 0.728 (0.710-0.746) | 0.828 | 0.633 | 0.684 | 0.793 | 0.749 |
| eICU-Train | XGBoost | 0.035 | 0.984 (0.978-0.988) | 0.992 | 0.975 | 0.975 | 0.992 | 0.983 |
| eICU-Valid | AdaBoost | 0.168 | 0.773 (0.745-0.799) | 0.814 | 0.575 | 0.902 | 0.39 | 0.856 |
| eICU-Valid | KNN | 0.198 | 0.694 (0.664-0.723) | 0.737 | 0.485 | 0.874 | 0.276 | 0.799 |
| eICU-Valid | LR | 0.201 | 0.691 (0.661-0.720) | 0.697 | 0.659 | 0.908 | 0.311 | 0.789 |
| eICU-Valid | Naive Bayes | 0.151 | 0.794 (0.768-0.819) | 0.861 | 0.473 | 0.887 | 0.414 | 0.874 |
| eICU-Valid | XGBoost | 0.165 | 0.767 (0.739-0.793) | 0.814 | 0.539 | 0.895 | 0.375 | 0.853 |
| MIMIC-IV | | AdaBoost | 0.187 | 0.720 (0.699-0.740) | 0.745 | 0.617 | 0.887 | 0.374 | 0.81 |
| MIMIC-IV | | KNN | 0.217 | 0.663 (0.640-0.684) | 0.672 | 0.625 | 0.879 | 0.32 | 0.762 |
| MIMIC-IV | | LR | 0.209 | 0.676 (0.654-0.697) | 0.691 | 0.614 | 0.879 | 0.329 | 0.774 |
| MIMIC-IV | | Naive Bayes | 0.19 | 0.738 (0.717-0.758) | 0.796 | 0.503 | 0.866 | 0.379 | 0.83 |
| MIMIC-IV | | XGBoost | 0.198 | 0.718 (0.697-0.739) | 0.753 | 0.578 | 0.878 | 0.366 | 0.811 |
| MIMIC-III | AdaBoost | 0.214 | 0.672 (0.630-0.711) | 0.692 | 0.616 | 0.829 | 0.427 | 0.755 |
| MIMIC-III | KNN | 0.239 | 0.631 (0.589-0.672) | 0.636 | 0.616 | 0.817 | 0.386 | 0.715 |
| MIMIC-III | LR | 0.229 | 0.622 (0.579-0.663) | 0.631 | 0.596 | 0.808 | 0.375 | 0.709 |
| MIMIC-III | Naive Bayes | 0.227 | 0.685 (0.644-0.724) | 0.753 | 0.5 | 0.802 | 0.429 | 0.777 |
| MIMIC-III | XGBoost | 0.225 | 0.664 (0.623-0.704) | 0.697 | 0.575 | 0.815 | 0.414 | 0.752 |

NOTE: CI: Confidence Interval; KNN: K-Nearest Neighbors; LR: Logistic Regression; NPV: Negative Predictive Value; PPV: Positive Predictive Value; XGBoost: Extreme Gradient Boosting.
