# Supplementary material for: Multicenter Machine Learning Model for Assessing the Impact of Malignancy on In-Hospital Mortality in Heart Failure Patients: A Clinical Decision Support System with Interpretable Artificial Intelligence
Source: Research Square preprint supplement (doi:10.21203/rs.3.rs-7179137/v1), 2025-08-21
Supplement: Supplementary file 2 [file 5abe71c226324afa391d7cc4.docx]

**Table1:** **Comparisons of baseline characteristics between the original cohort and matched cohort**

|  | **Before PSM** | | | | **After PSM** | | | |
| --- | --- | --- | --- | --- | --- | --- | --- | --- |
| **Characteristic** | **Non-malignancy** N = 18,239 | **Malignancy**  N = 3,397 | **SMD** | **95% CI** | **Non-malignancy**   N = 6,679 | **Malignancy**   N = 3,392 | **SMD** | **95% CI** |
| Gender(female) | 8,623 (47%) | 1,569 (46%) | 0.02 | -0.01, 0.06 | 3,012 (45%) | 1,568 (46%) | 0.02 | -0.02, 0.07 |
| Age | 71 (61, 81) | 75 (67, 83) | -0.38 | -0.42, -0.35 | 76 (66, 84) | 75 (67, 83) | -0.02 | -0.07, 0.02 |
| Race |  |  | 0.22 | 0.18, 0.26 |  |  | 0.02 | -0.02, 0.06 |
| Asian | 292 (1.6%) | 32 (0.9%) |  |  | 70 (1.0%) | 32 (0.9%) |  |  |
| Black | 2,723 (15%) | 331 (9.7%) |  |  | 662 (9.9%) | 331 (9.8%) |  |  |
| Other | 1,731 (9.5%) | 216 (6.4%) |  |  | 449 (6.7%) | 216 (6.4%) |  |  |
| White | 13,493 (74%) | 2,818 (83%) |  |  | 5,498 (82%) | 2,813 (83%) |  |  |
| Weight | 83 (68, 103) | 80 (67, 97) | 0.19 | 0.15, 0.22 | 80 (66, 97) | 80 (67, 97) | 0.01 | -0.03, 0.05 |
| Sapsii | 32 (24, 41) | 35 (28, 44) | -0.23 | -0.26, -0.19 | 34 (27, 44) | 35 (28, 44) | -0.02 | -0.06, 0.02 |
| Sepsis | 6,655 (36%) | 1,389 (41%) | 0.09 | 0.05, 0.13 | 2,687 (40%) | 1,387 (41%) | 0.01 | -0.03, 0.05 |
| Ventilation | 9,179 (50%) | 1,574 (46%) | 0.08 | 0.04, 0.12 | 3,116 (47%) | 1,573 (46%) | 0.01 | -0.04, 0.05 |
| CRRT | 1,197 (6.6%) | 198 (5.8%) | 0.03 | -0.01, 0.07 | 391 (5.9%) | 197 (5.8%) | 0.00 | -0.04, 0.04 |
| Sedative | 4,177 (23%) | 700 (21%) | 0.06 | 0.02, 0.09 | 1,390 (21%) | 700 (21%) | 0.00 | -0.04, 0.05 |
| Vasopressors | 3,587 (20%) | 678 (20%) | 0.01 | -0.03, 0.04 | 1,347 (20%) | 676 (20%) | 0.01 | -0.04, 0.05 |
| Hypertension | 12,951 (71%) | 2,494 (73%) | 0.05 | 0.02, 0.09 | 4,907 (73%) | 2,489 (73%) | 0.00 | -0.04, 0.04 |
| AFib | 7,136 (39%) | 1,516 (45%) | 0.11 | 0.08, 0.15 | 2,962 (44%) | 1,513 (45%) | 0.01 | -0.04, 0.05 |
| CAD | 15,743 (86%) | 2,916 (86%) | 0.01 | -0.02, 0.05 | 5,772 (86%) | 2,913 (86%) | 0.02 | -0.03, 0.06 |
| Diabetes | 8,274 (45%) | 1,436 (42%) | 0.06 | 0.03, 0.10 | 2,882 (43%) | 1,434 (42%) | 0.02 | -0.02, 0.06 |
| CKD | 6,130 (34%) | 1,195 (35%) | 0.03 | 0.00, 0.07 | 2,379 (36%) | 1,192 (35%) | 0.01 | -0.03, 0.05 |
| COPD | 6,118 (34%) | 1,277 (38%) | 0.08 | 0.05, 0.12 | 2,446 (37%) | 1,277 (38%) | 0.02 | -0.02, 0.06 |
| Stroke | 2,731 (15%) | 559 (16%) | 0.04 | 0.00, 0.08 | 1,120 (17%) | 558 (16%) | 0.01 | -0.03, 0.05 |
| MAP | 82 (69, 97) | 79 (67, 93) | 0.13 | 0.09, 0.17 | 79 (67, 94) | 79 (67, 93) | 0.00 | -0.05, 0.04 |
| HR | 86 (73, 101) | 88 (74, 103) | -0.08 | -0.12, -0.04 | 87 (74, 103) | 88 (74, 103) | -0.01 | -0.05, 0.03 |
| Temperature | 36.70 (36.39, 37.00) | 36.70 (36.39, 37.00) | 0.00 | -0.03, 0.04 | 36.70 (36.39, 37.00) | 36.70 (36.39, 37.00) | 0.00 | -0.04, 0.04 |
| RR | 20 (17, 25) | 21 (17, 25) | -0.08 | -0.11, -0.04 | 20 (17, 25) | 21 (17, 25) | -0.01 | -0.05, 0.04 |
| SpO2 | 97.3 (95.0, 100.0) | 97.0 (95.0, 100.0) | 0.04 | 0.01, 0.08 | 97.0 (95.0, 100.0) | 97.0 (95.0, 100.0) | 0.00 | -0.04, 0.04 |
| HCO3 | 25.0 (22.0, 28.6) | 25.0 (22.0, 28.2) | 0.03 | -0.01, 0.06 | 25.0 (22.0, 28.5) | 25.0 (22.0, 28.2) | 0.01 | -0.03, 0.05 |
| Creatinine | 1.38 (0.96, 2.23) | 1.33 (0.95, 2.09) | 0.11 | 0.07, 0.14 | 1.36 (0.96, 2.10) | 1.33 (0.95, 2.10) | 0.00 | -0.04, 0.04 |
| BUN | 29 (19, 45) | 29 (19, 44) | 0.01 | -0.03, 0.04 | 30 (20, 44) | 29 (19, 44) | 0.00 | -0.04, 0.04 |
| WBC | 10.3 (7.8, 14.0) | 10.4 (7.6, 14.3) | -0.05 | -0.08, -0.01 | 10 (8, 14) | 10 (8, 14) | -0.01 | -0.05, 0.04 |
| RDW | 15.50 (14.50, 17.00) | 15.90 (14.70, 17.40) | -0.17 | -0.21, -0.13 | 15.89 (14.70, 17.40) | 15.90 (14.70, 17.40) | 0.00 | -0.04, 0.04 |
| Hb | 10.70 (9.30, 12.10) | 10.20 (8.90, 11.50) | 0.24 | 0.20, 0.27 | 10.20 (8.80, 11.60) | 10.20 (8.90, 11.50) | 0.01 | -0.03, 0.05 |
| Platelet | 192 (148, 241) | 186 (139, 240) | 0.05 | 0.01, 0.08 | 189 (143, 239) | 186 (139, 241) | 0.00 | -0.04, 0.04 |
| Calcium | 8.50 (8.00, 8.90) | 8.40 (8.00, 8.90) | 0.05 | 0.01, 0.09 | 8.40 (8.00, 8.90) | 8.40 (8.00, 8.90) | 0.00 | -0.04, 0.04 |
| Chloride | 102 (98, 106) | 102 (99, 106) | -0.02 | -0.06, 0.02 | 103 (98, 107) | 102 (99, 106) | 0.01 | -0.03, 0.05 |
| Sodium | 138.0 (135.0, 141.0) | 138.0 (135.0, 141.0) | 0.04 | 0.01, 0.08 | 138.0 (135.0, 141.0) | 138.0 (135.0, 141.0) | 0.01 | -0.03, 0.05 |
| Potassium | 4.10 (3.71, 4.60) | 4.10 (3.70, 4.60) | 0.03 | 0.00, 0.07 | 4.10 (3.70, 4.60) | 4.10 (3.70, 4.60) | 0.00 | -0.04, 0.04 |
| Blood.Glucose | 133 (106, 177) | 133 (107, 171) | 0.06 | 0.02, 0.09 | 131 (105, 173) | 133 (107, 171) | 0.01 | -0.03, 0.05 |

NOTE:AFib: atrial fibrillation; BUN: blood urea nitrogen; CAD: coronary artery disease; CI: Confidence Interval; CKD: chronic kidney disease; COPD: chronic obstructive pulmonary disease; CRRT: continuous renal replacement therapy; Hb: hemoglobin; HR: heart rate; MAP: mean arterial pressure; PSM: propensity score matching; RDW: red cell distribution width; RR: respiratory rate; SAPS-II: Simplified Acute Physiology Score II; SMD: standardized mean difference; SpO₂: peripheral oxygen saturation; WBC: white blood cell count
